# Supplementary material for: Modelling the size distribution of aggregated volcanic ash and implications for operational atmospheric dispersion modelling
Source: Copernicus journal article supplement (doi:10.5194/acp-22-3409-2022), 2022-03-15
Supplement: Supplementary file 1 [file acp-22-3409-2022-supplement.pdf]

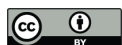

*Supplement of*

## **Modelling the size distribution of aggregated volcanic ash and implications for operational atmospheric dispersion modelling**

**Frances Beckett et al.**

*Correspondence to:* Frances Beckett ([frances.beckett@metoffice.gov.uk](mailto:frances.beckett@metoffice.gov.uk))

The copyright of individual parts of the supplement might differ from the article licence.

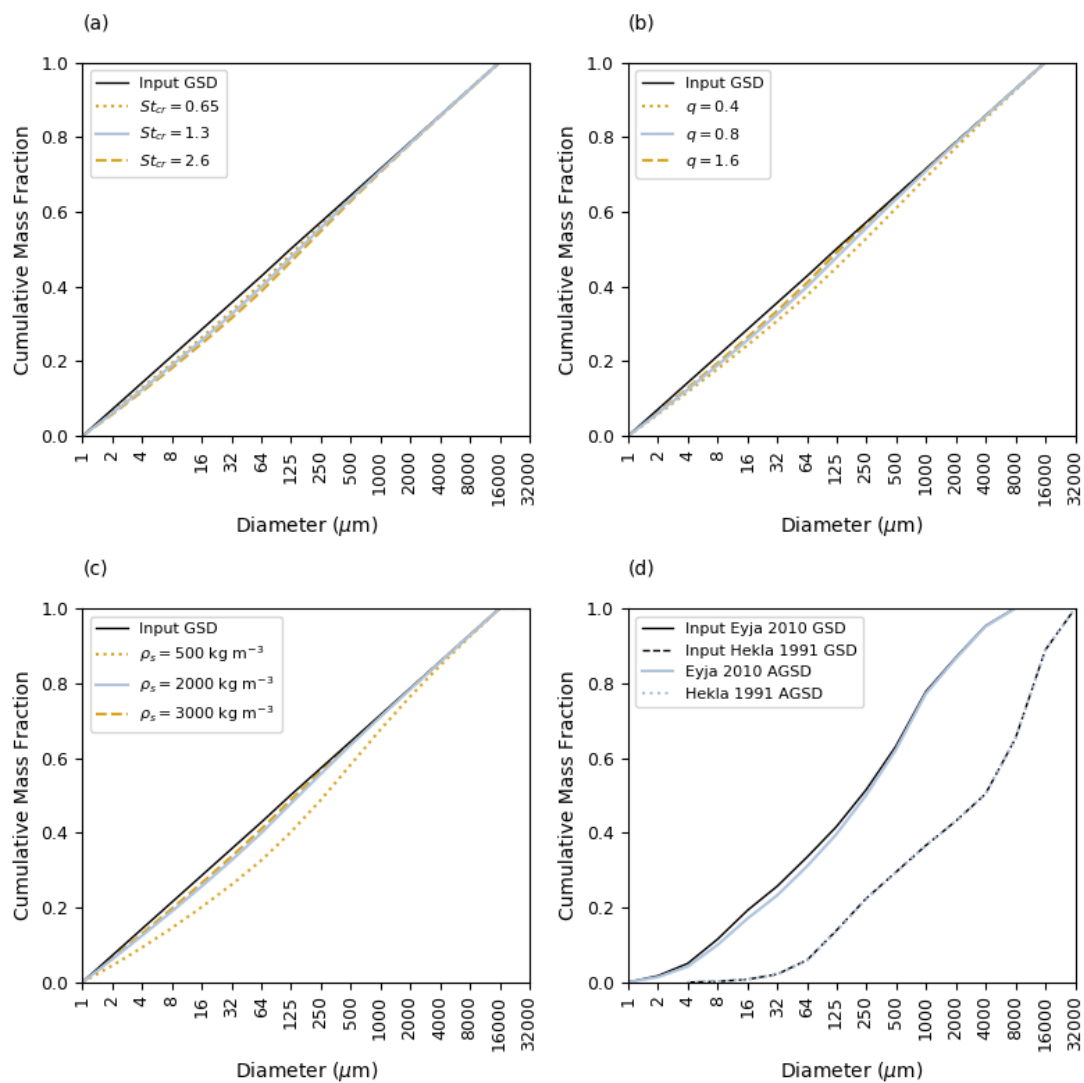

Figure S1: Sensitivity of the output aggregated GSD to the sticking efficiency parameters (a)  $St_{cr}$ , (b)  $q$ , and the physical characteristics assigned to the particles, (c) particle density ( $\rho_s$ ) and (d) input GSD. Output is for 12:00 UTC on the 05/05/2010, plume height 5500 m asl.

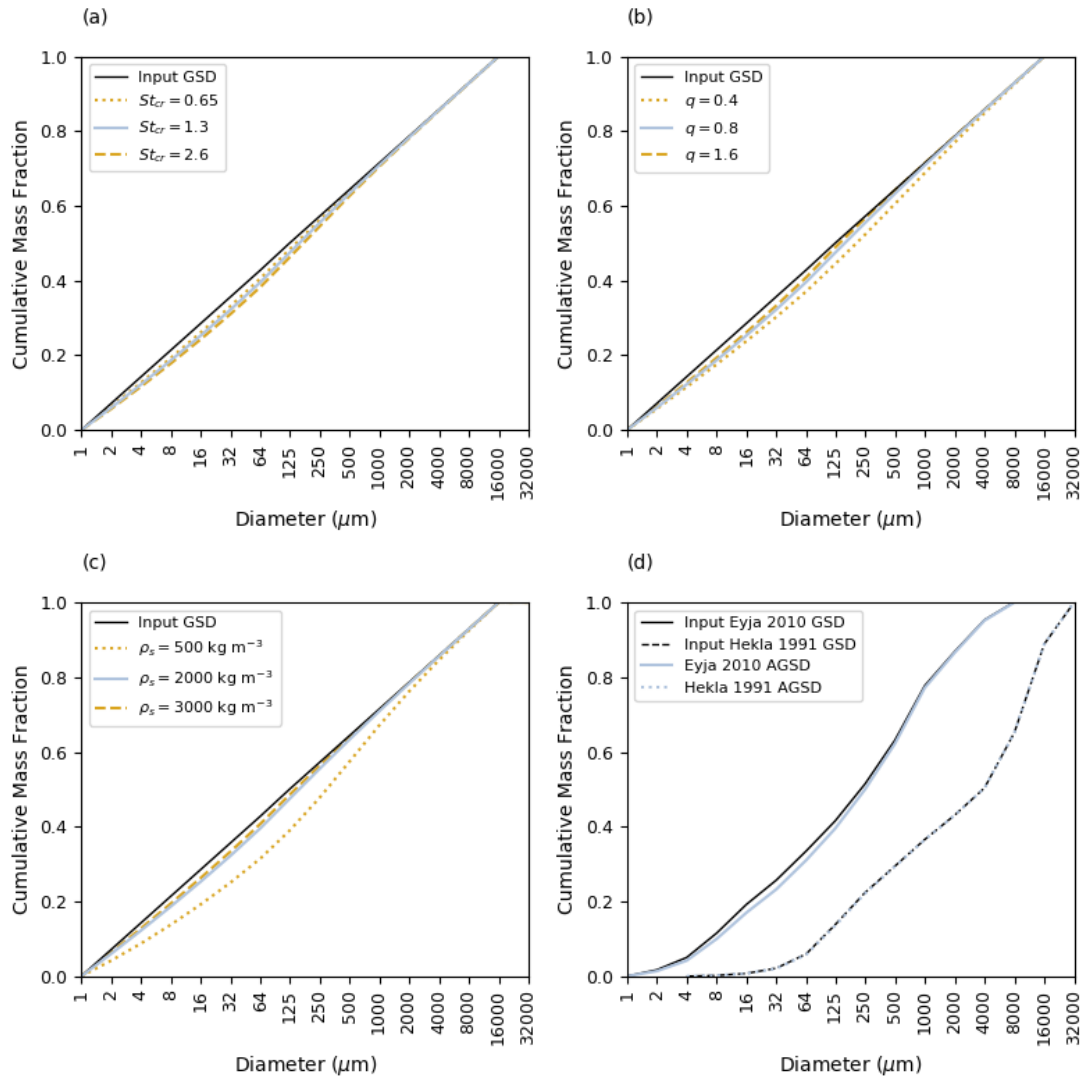

Figure S2: Sensitivity of the output aggregated GSD to the sticking efficiency parameters (a)  $St_{cr}$ , (b)  $q$ , and the physical characteristics assigned to the particles, (c) particle density ( $\rho_s$ ) and (d) input GSD. Output is for 13:00 UTC on the 06/05/2010, plume height 10000 m asl.

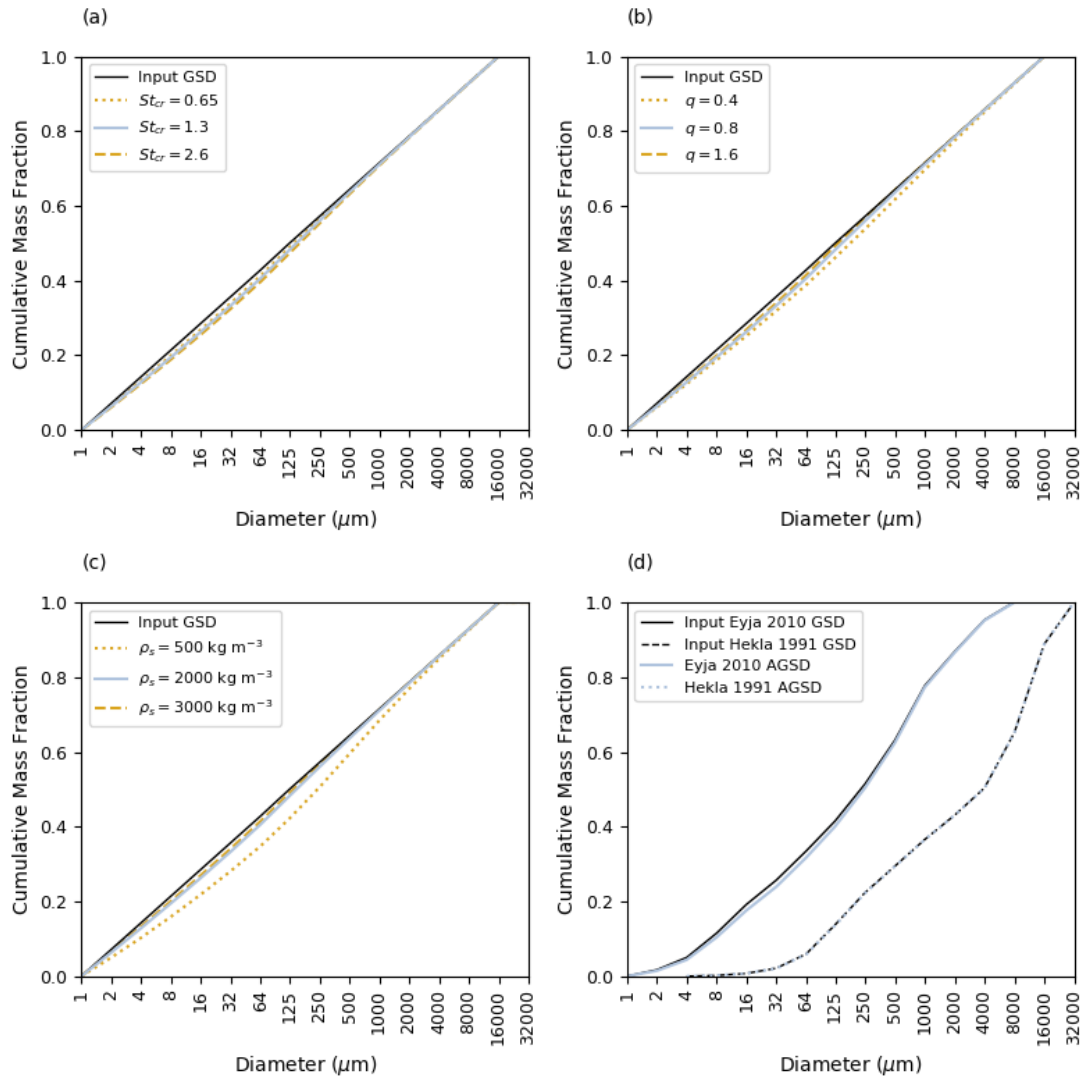

Figure S3: Sensitivity of the output aggregated GSD to the sticking efficiency parameters (a)  $St_{cr}$ , (b)  $q$ , and the physical characteristics assigned to the particles, (c) particle density ( $\rho_s$ ) and (d) input GSD. Output is for 12:00 UTC on the 07/05/2010, plume height 5500 m asl.

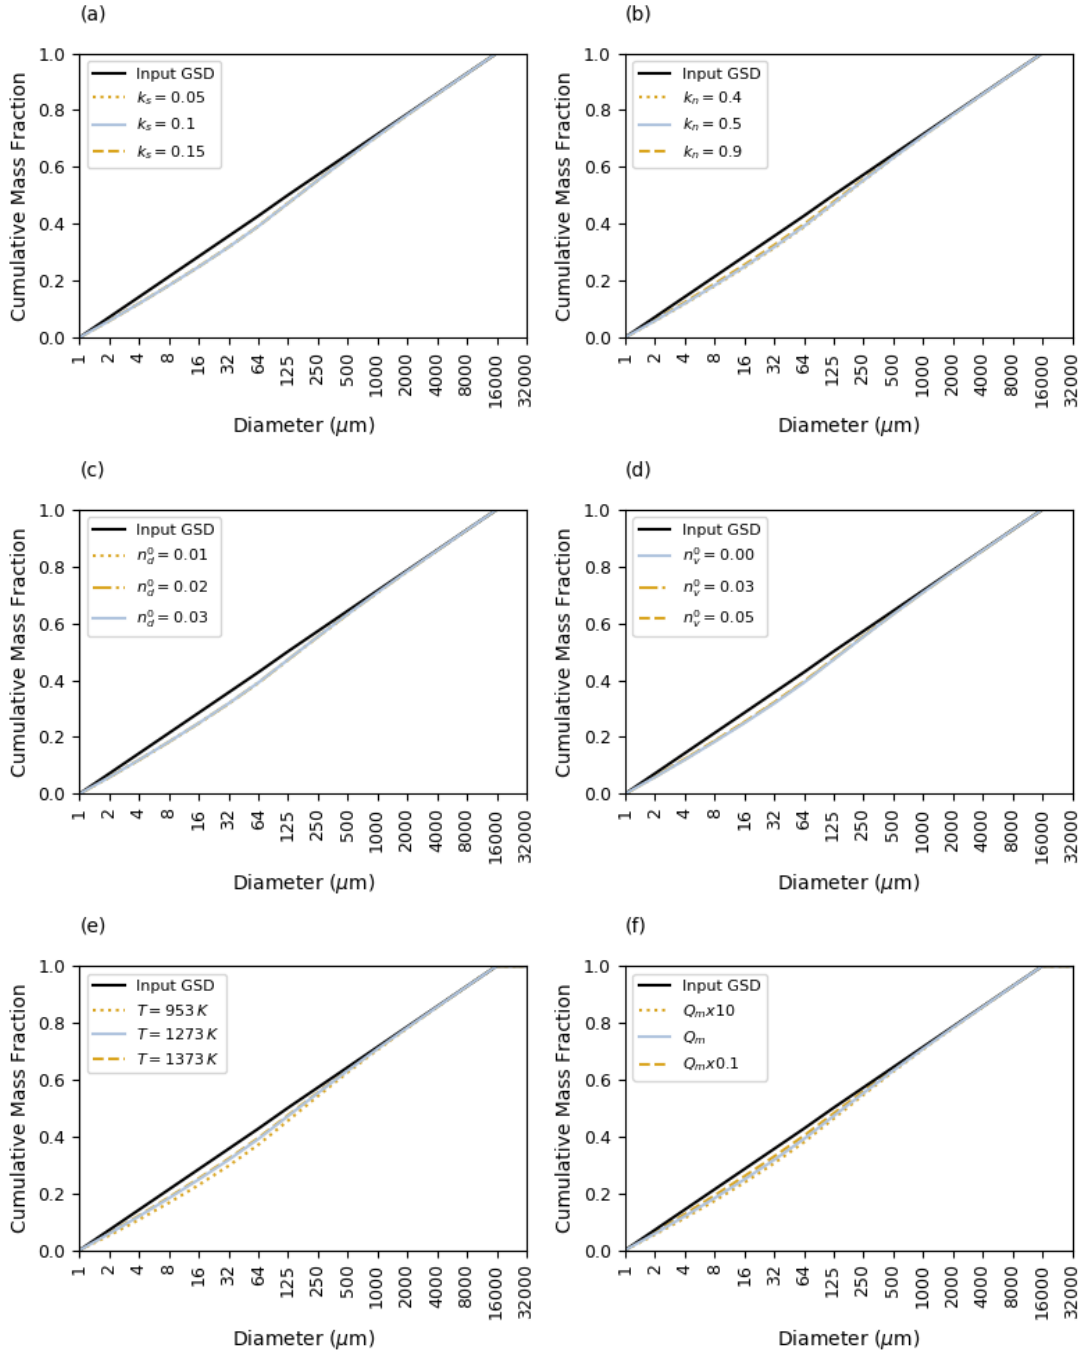

Figure S4: Sensitivity of the output aggregated GSD to the entrainment coefficients (a)  $k_s$ , (b)  $k_n$ , the fraction of dry air (c)  $n_d$  and water vapour (d)  $n_v$ , the temperature of the plume at the source (e)  $T_0$  and the source mass flux (f)  $Q_m$ . Output is for 19:00 UTC on the 04/05/2010, plume height 7000 m asl.

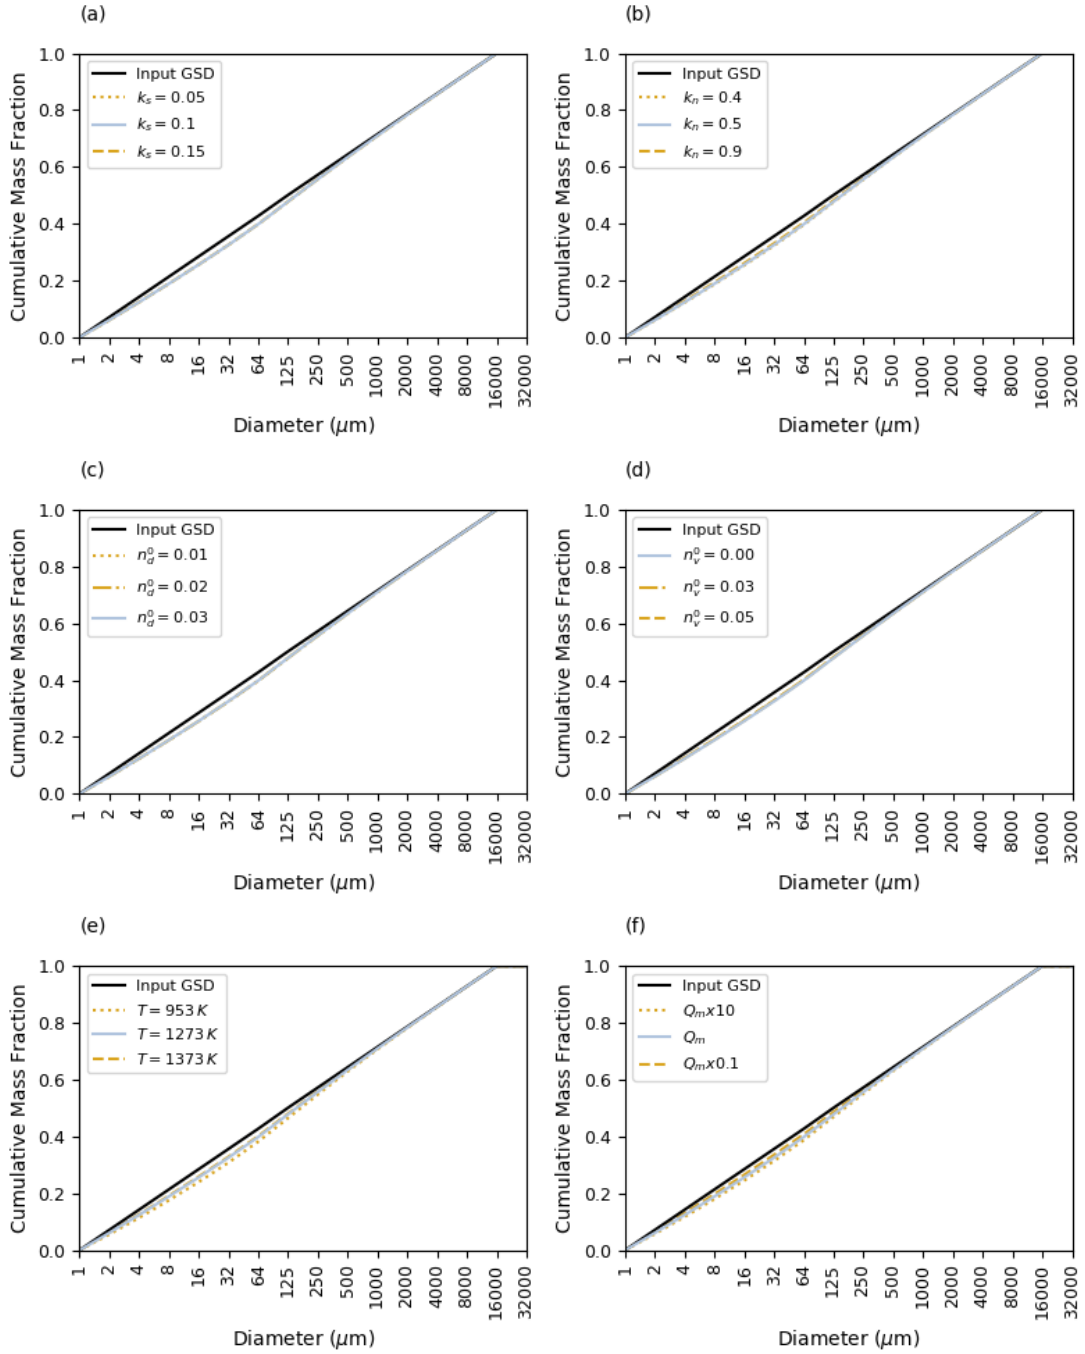

Figure S5: Sensitivity of the output aggregated GSD to the entrainment coefficients (a)  $k_s$ , (b)  $k_n$ , the fraction of dry air (c)  $n_d$  and water vapour (d)  $n_v$ , the temperature of the plume at the source (e)  $T_0$  and the source mass flux (f)  $Q_m$ . Output is for 12:00 UTC on the 05/05/2010, plume height 5500 m asl.

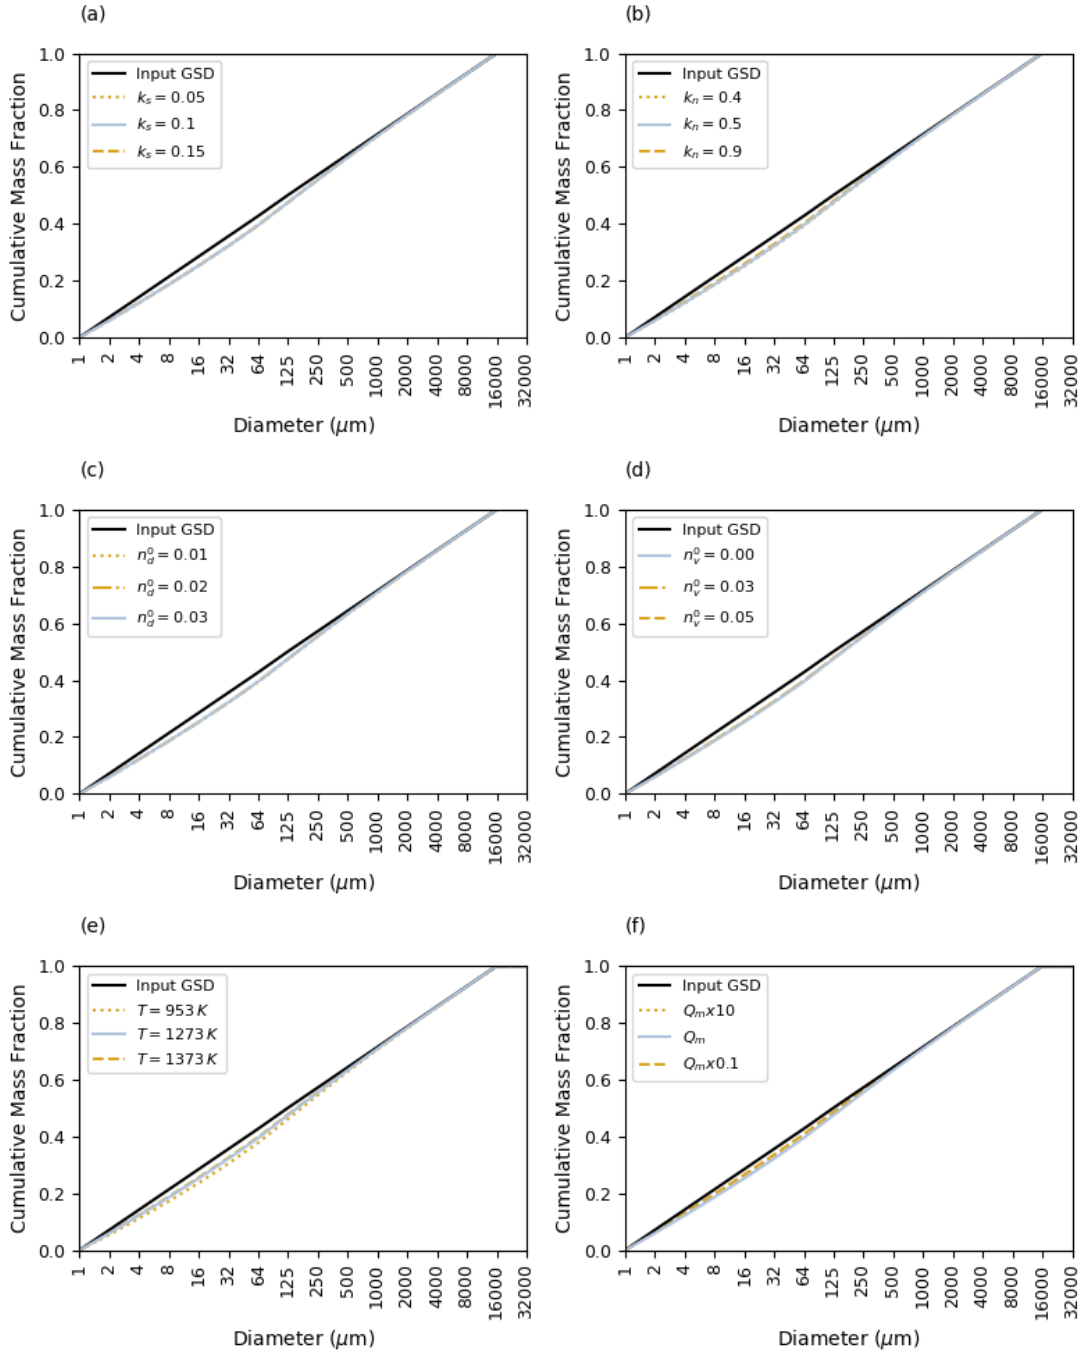

Figure S6: Sensitivity of the output aggregated GSD to the entrainment coefficients (a)  $k_s$ , (b)  $k_n$ , the fraction of dry air (c)  $n_d$  and water vapour (d)  $n_v$ , the temperature of the plume at the source (e)  $T_0$  and the source mass flux (f)  $Q_m$ . Output is for 13:00 UTC on the 06/05/2010, plume height 10000 m asl.

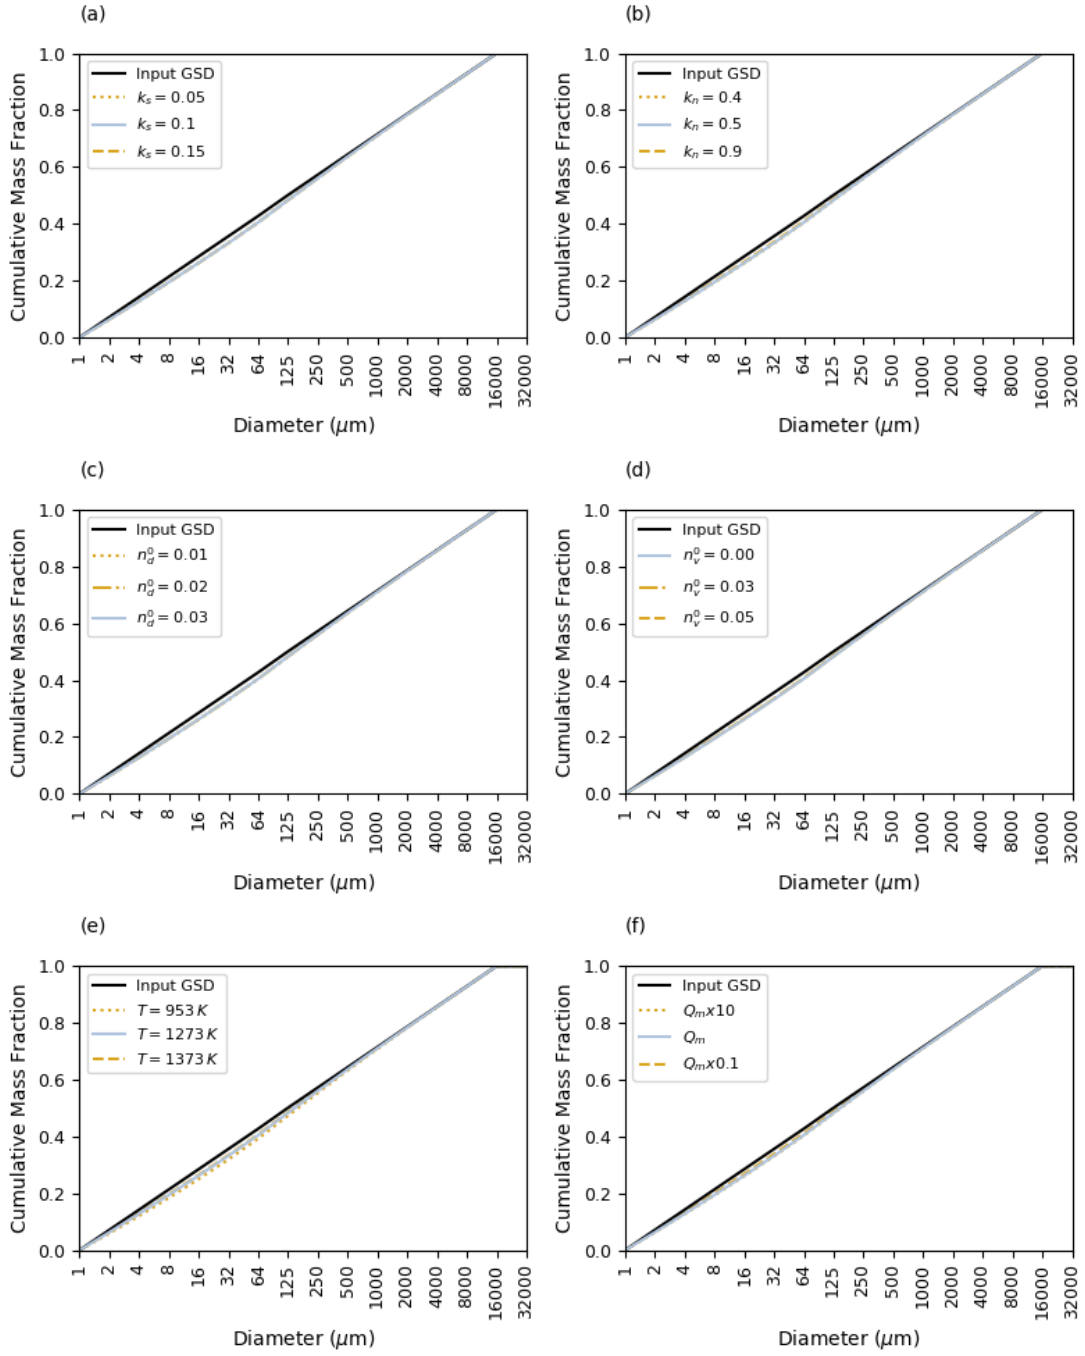

Figure S7: Sensitivity of the output aggregated GSD to the entrainment coefficients (a)  $k_s$ , (b)  $k_r$ , the fraction of dry air (c)  $n_d$  and water vapour (d)  $n_v$ , the temperature of the plume at the source (e)  $T_0$  and the source mass flux (f)  $Q_m$ . Output is for 12:00 UTC on the 07/05/2010, plume height 5500 m asl.
